# Supplementary material for: MicroRNA-mediated control of developmental lymphangiogenesis
Source: eLife. 2019 Sep 3;8:e46007. doi: 10.7554/eLife.46007 (PMC6721793; doi:10.7554/eLife.46007)
Supplement: Supplementary file 1. [file elife-46007-supp1.xlsx]

## Sheet: Sheet1
Lymphatic Genes	Human	Context ++ score percentile	3UTR length		Zebrafish	Context ++ score percentile	3UTR length
NFATC1	1	96	0.5kb		1	34	1.5kb
PROX1	1	26	5.6kb		0	n/a	3.8kb
LYVE1	1	85	3.8kb		0	n/a	0.5kb
FLT4 (VEGFR3)	1	41	0.5kb		0	n/a	0.4kb
VEGFC	0	n/a	4.2kb		0	n/a	0.8kb
CCBE1	1	53	4.9kb		0	n/a	0.1kb
PDPN	0	n/a	2.0kb		n/a	n/a	n/a
NRP2	2	41, 57	3.0kb		0	n/a	1.8kb
NR2F2	1	26	2.6kb		1	57	2.8kb
FIGF (VEGFD)	0	n/a	0.5kb		0	n/a	0.5kb
ANGPT2	0	n/a	3.4kb		0	n/a	0.6kb
STAB1	0	n/a	0.1kb		1	40	3.2kb
FOXC2	1	41	0.9kb		n/a	n/a	n/a
SOX18	0	n/a	0.5kb		0	n/a	0.8kb
MAFB	0	n/a	2.0kb		1	97	0.4kb
MRC1	0	n/a	0.7kb		0	n/a	0.4kb
JUNB	0	n/a	0.5kb		0	n/a	0.4kb
FGFR3	0	n/a	1.6kb		0	n/a	5.1kb
CXCR4	1	98	0.5kb		0	n/a	0.3kb
CXCL12	0	n/a	1.5kb		0	n/a	2.9kb
SYK	1	26	2.9kb		0	n/a	0.1kb
LCP2 (SLP76)	0	n/a	2.4kb		0	n/a	0.1kb
