# Supplementary material for: MicroRNA-mediated control of developmental lymphangiogenesis
Source: eLife. 2019 Sep 3;8:e46007. doi: 10.7554/eLife.46007 (PMC6721793; doi:10.7554/eLife.46007)
Supplement: Supplementary file 2. [file elife-46007-supp2.xlsx]

## Sheet: Supplementary file 2a-Cloning
Purpose	Primer sequence
zebrafish nfatc1 3'UTR cloning_F	TAAGCACTCGAGGACATTGAGGCCGTCAGAAC
zebrafish nfatc1 3'UTR cloning_R	TAAGCAGCGGCCGCTCGCATTAGGTCTGATTGTCA
human NFATC1 3'UTR cloning_F	TAAGCACTCGAGCGTTCACGTCAGTTTCTACGTC
human NFATC1 3'UTR cloning_R	TAAGCAGCGGCCGCCCTAAAGGTGCCTGCAAAATAG
zebrafish nfatc1 3'UTR mutagenesis_F	GTGAGCTGGAATTAATCAAACCATAACCCTAATATAGCAATTCTGTCCCCTCTGTG
zebrafish nfatc1 3'UTR mutagenesis_R	CACAGAGGGGACAGAATTGCTATATTAGGGTTATGGTTTGATTAATTCCAGCTCAC
human NFATC1 3'UTR mutagenesis_F	CCATCGATGCCCTGAAAAGGAAAGGAAAACCCTAGCTTCGGATGCATT
human NFATC1 3'UTR mutagenesis_R	AATGCATCCGAAGCTAGGGTTTTCCTTTCCTTTTCAGGGCATCGATGG
Kpn1-mir-204-1_F	TAAGCAGGTACCCCACCAATCCAAGCGTCTAT
EcoR1-mir-204-1_R	TAAGCAGAATTCAGCAAACACCAGCATCACAC
mir-204-1 4bp mutagenesis_F	CCTGTGGACTAGGGTTTGTCATCCTATGCC
mir-204-1 4bp mutagenesis_R	TCACATGACAAGGGAGGG

## Sheet: Supplementary file 2b-MO
Morpholino	Sequence
Pan-204_MO (targets all 3 miR-204s)	AGGCATAGGATGACAAAGGGAA
miR-204_MO1 (only targets miR-204-1)	ACTTCCCAGCCCCCTCTATTACTCCA
miR-204_MO2 (only targets miR-204-2)	ACTTCCCAGCCCCCTCTATTACTCCA
miR-204_MO3 (only targets miR-204-3)	TGTCCCTGCCTTATCACAAACTCTA
nfatc1_splice_MO	CGCATCTGTAAGGTACAATCACATT (published, PMID:21571218)
nfatc1_ATG_MO	GATTTCATGCTTGCGAAGTGTAGAC
Standard Ctrl_MO	CCTCTTACCTCAGTTACAATTTATA

## Sheet: Supplementary file 2c-CRISPR
Name	Sequence
dre-mir-204-1 targeting oligo (cas9)	taatacgactcactataGGTGACAAAGGGAAGTCCACgttttagagctagaa
dre-mir-204-1 genotyping ABI primer_F	TGTAAACGACGGCCAGTAAGGTCAACAGAAAGTGAAC
dre-mir-204-1 genotyping ABI primer_R	GTGTCTTCACATGCTGCTTCCTATGGA
dre-mir-204-2 targeting oligo (cpf1)	ACAAAGGGAAACCCAGGAGGTCA (synthesized from IDT)
dre-mir-204-2 targeting oligo (full crRNA)	ACAAAGGGAAACCCAGGAGGTCAatctacacttagtagaaatta
dre-mir-204-2 genotyping ABI primer_F	TGTAAACGACGGCCAGTAAGTCAATTCAGAGAACAACCAC
dre-mir-204-2 genotyping ABI primer_R	GTGTCTTGCACAAAATTAGCAGTGTTCCA
dre-mir-204-3 targeting oligo (cpf1)	GGAAACCCACAGGTCACAGACGC (synthesized from IDT)
dre-mir-204-3 targeting oligo (full crRNA)	GGAAACCCACAGGTCACAGACGCatctacacttagtagaaatta
dre-mir-204-3 genotyping ABI primer_F	TGTAAACGACGGCCAGTATCGTGCAGCATAAGTGTCGT
dre-mir-204-3 genotyping ABI primer_R	GTGTCTTAAGAGAAGAGGGGAGCACAAT
nfatc1 targeting oligo (cas9)	taatacgactcactataGGAGATTGATTTGGCGAGTAgttttagagctagaa
nfatc1 genotyping ABI primer_F	TGTAAACGACGGCCAGAGTCCTGCACTCTTGGTGCT
nfatc1 genotyping ABI primer_R	GTGTCTTAACCAACTGTCCTCCGTCAC
